# Supplementary material
Source: PubMed Central journal article supplement (PMC6132624)
Supplement: zsy114_suppl_supplemental_material.pdf [file zsy114_suppl_supplemental_material.pdf]

**“The bidirectional association between physical activity and sleep in middle-aged and older adults: a prospective study based on polysomnography” – SUPPLEMENTAL MATERIAL**

**Table S1.** Beta-coefficients<sup>a</sup> (Standard error) of sleep outcomes and of changes in sleep parameters by continuous physical activity at baseline and change in physical activity during the follow-up.

| PA at baseline<br>(MET-minutes/week) | TST < 6h        | SOL > 10 min   | WASO > 60 min  | Sleep<br>efficiency < 80%  | % TST in<br>N1 < 10%  | % TST in<br>N2 < 65%  | % TST in<br>N3 < 10%  | % TST in<br>REM < 15%  |
|--------------------------------------|-----------------|----------------|----------------|----------------------------|-----------------------|-----------------------|-----------------------|------------------------|
| <b>Unadjusted model</b>              |                 |                |                |                            |                       |                       |                       |                        |
| Continuous PA at baseline            | -0.003 (0.005)  | -0.003 (0.003) | -0.002 (0.003) | 0.001 (0.003)              | -0.003 (0.005)        | 0.0003 (0.004)        | 0.0002 (0.004)        | 0.0004 (0.004)         |
| Continuous change in PA              | 0.004 (0.004)   | 0.002 (0.003)  | 0.002 (0.003)  | 0.001 (0.004)              | -0.005 (0.004)        | -0.005 (0.005)        | 0.004 (0.003)         | -0.005 (0.003)         |
| <b>Model 1</b>                       |                 |                |                |                            |                       |                       |                       |                        |
| Continuous PA at baseline            | -0.004 (0.005)  | -0.003 (0.003) | -0.003 (0.003) | 0.001 (0.003)              | -0.0001 (0.004)       | 0.003 (0.004)         | -0.0008 (0.004)       | 0.002 (0.003)          |
| Continuous change in PA              | 0.003 (0.003)   | 0.002 (0.003)  | 0.001 (0.003)  | 0.0001 (0.004)             | -0.005 (0.004)        | -0.007 (0.005)        | 0.005 (0.003)         | -0.006 (0.003)         |
| <b>Model 2</b>                       |                 |                |                |                            |                       |                       |                       |                        |
| Continuous PA at baseline            | -0.007 (0.006)  | -0.003 (0.003) | -0.004 (0.003) | 0.0002 (0.003)             | -0.001 (0.004)        | 0.003 (0.004)         | 0.001 (0.005)         | 0.003 (0.003)          |
| Continuous change in PA              | 0.003 (0.003)   | 0.001 (0.003)  | 0.001 (0.003)  | -0.0001 (0.004)            | -0.005 (0.004)        | -0.005 (0.006)        | 0.006 (0.003)         | -0.005 (0.003)         |
|                                      | TST change      | SOL change     | WASO change    | Sleep<br>efficiency change | % TST in<br>N1 change | % TST in<br>N2 change | % TST in<br>N3 change | % TST in<br>REM change |
| <b>Unadjusted model</b>              |                 |                |                |                            |                       |                       |                       |                        |
| Continuous PA at baseline            | -0.0006 (0.002) | -0.04 (0.04)   | 0.13 (0.08)    | -0.02 (0.02)               | 0.002 (0.01)          | -0.004 (0.02)         | -0.008 (0.01)         | 0.009 (0.01)           |
| Continuous change in PA              | -0.001 (0.002)  | 0.005 (0.04)   | 0.05 (0.09)    | -0.02 (0.02)               | 0.01 (0.01)           | -0.009 (0.02)         | -0.0003 (0.01)        | -0.005 (0.01)          |
| <b>Model 1</b>                       |                 |                |                |                            |                       |                       |                       |                        |
| Continuous PA at baseline            | -0.0006 (0.002) | -0.03 (0.04)   | 0.11 (0.09)    | -0.02 (0.02)               | -0.0008 (0.01)        | 0.007 (0.02)          | -0.01 (0.01)          | 0.006 (0.01)           |
| Continuous change in PA              | -0.001 (0.002)  | 0.004 (0.04)   | 0.04 (0.09)    | -0.01 (0.02)               | 0.02 (0.01)           | -0.003 (0.02)         | -0.006 (0.01)         | -0.008 (0.01)          |
| <b>Model 2</b>                       |                 |                |                |                            |                       |                       |                       |                        |
| Continuous PA at baseline            | -0.0006 (0.002) | -0.001 (0.04)  | 0.06 (0.09)    | -0.01 (0.02)               | -0.005 (0.01)         | 0.006 (0.02)          | -0.01 (0.01)          | 0.01 (0.01)            |
| Continuous change in PA              | -0.001 (0.002)  | -0.002 (0.04)  | 0.03 (0.09)    | -0.01 (0.02)               | 0.02 (0.01)           | -0.007 (0.02)         | -0.003 (0.01)         | -0.007 (0.01)          |

CI: confidence interval; N1, N2, N3: sleep stages; PA: physical activity; REM: rapid eye movement sleep stage; RR: relative risk; SOL: sleep onset latency; TST: total sleep time; WASO: wake after sleep onset.

<sup>a</sup> Beta-coefficients obtained with mixed-effect models adjusted by the covariates indicated for each model.

**Model 1:** Adjusted by age (y), sex (male vs. female), educational level (thru high-school vs. some college), marital status (married vs. not married), current smoker (no vs. yes), alcohol intake (drinks/week), follow-up time (y) and by the difference in time between physical activity and sleep information (y) at baseline.

**Model 2:** Adjusted by the same variables in Model 1 and by baseline BMI (kg/m<sup>2</sup>), change in BMI over the follow-up (kg/m<sup>2</sup>), self-rated health (excellent or very good vs. good, fair or poor), depression (no depression symptoms vs. depression symptoms or current use of antidepressants), baseline apnea-hypopnea index and Continuous Positive Airway Pressure use at baseline polysomnography.

**“The bidirectional association between physical activity and sleep in middle-aged and older adults: a prospective study based on polysomnography” – Supplemental material**

**Table S2.** Beta-coefficients<sup>a</sup> (Standard error) of changes in physical activity by continuous values for sleep parameters at baseline and continuous changes in sleep parameters during the follow-up.

| <b>Sleep condition (exposure)</b> | <b>Continuous change in PA<br/>(MET-minutes/week)</b> | <b>Proportional change in PA<br/>(%)</b> |
|-----------------------------------|-------------------------------------------------------|------------------------------------------|
| <b>TST (hours)</b>                |                                                       |                                          |
| Continuous TST at baseline        | 0.31 (1.39)                                           | -22.6 (35.0)                             |
| Continuous change in TST          | -0.56 (1.18)                                          | -8.76 (29.8)                             |
| <b>SOL (minutes)</b>              |                                                       |                                          |
| Continuous SOL at baseline        | -0.002 (0.08)                                         | -1.91 (2.09)                             |
| Continuous change in SOL          | -0.002 (0.06)                                         | 0.19 (1.46)                              |
| <b>WASO (minutes)</b>             |                                                       |                                          |
| Continuous WASO at baseline       | -0.02 (0.03)                                          | 0.43 (0.83)                              |
| Continuous change in WASO         | 0.009 (0.03)                                          | -0.28 (0.70)                             |
| <b>Sleep efficiency (%)</b>       |                                                       |                                          |
| Continuous efficiency at baseline | 0.09 (0.13)                                           | -1.46 (3.30)                             |
| Continuous change in efficiency   | -0.05 (0.11)                                          | 0.69 (2.87)                              |
| <b>TST in N1 sleep (%)</b>        |                                                       |                                          |
| Continuous % in N1 at baseline    | -0.35 (0.21)                                          | 0.88 (5.35)                              |
| Continuous change in % in N1      | 0.25 (0.19)                                           | 1.03 (4.74)                              |
| <b>TST in N2 sleep (%)</b>        |                                                       |                                          |
| Continuous % in N2 at baseline    | -0.02 (0.13)                                          | -1.27 (3.41)                             |
| Continuous change in % in N2      | -0.05 (0.13)                                          | -2.72 (3.28)                             |
| <b>TST in N3 sleep (%)</b>        |                                                       |                                          |
| Continuous % in N3 at baseline    | 0.11 (0.15)                                           | -2.11 (3.84)                             |
| Continuous change in % in N3      | -0.05 (0.19)                                          | 1.81 (4.77)                              |
| <b>TST in REM (%)</b>             |                                                       |                                          |
| Continuous % in REM at baseline   | 0.17 (0.21)                                           | 6.60 (5.41)                              |
| Continuous change in % in REM     | -0.10 (0.18)                                          | 2.57 (4.53)                              |

**CI:** confidence interval; **N1, N2, N3:** sleep stages; **PA:** physical activity; **REM:** rapid eye movement sleep stage; **RR:** relative risk; **SOL:** sleep onset latency; **TST:** total sleep time; **WASO:** wake after sleep onset.

<sup>a</sup> Beta-coefficients obtained with mixed-effect models adjusted by age (y), sex (male vs. female), educational level (thru high-school vs. some college), marital status (married vs. not married), current smoker (no vs. yes), alcohol intake (drinks/week), follow-up time (y), difference in time between physical activity and sleep information (y) at baseline, baseline BMI (kg/m<sup>2</sup>), change in BMI over the follow-up (kg/m<sup>2</sup>), self-rated health (excellent or very good vs. good, fair or poor), depression (no depression symptoms vs. depression symptoms or current use of antidepressants), baseline apnea-hypopnea index and Continuous Positive Airway Pressure use at baseline polysomnography.
